# Supplementary material
Source: PubMed Central journal article supplement (PMC7205576)
Supplement: NIHMS1548059-supplement-1.pdf [file NIHMS1548059-supplement-1.pdf]

## Create ScanFold Submission

## Submit your sequence (in FASTA format):

```
>hg38|chr6:43784726..43785077(VEGFA_riboswitch_region)
GACTCTGCGCAGAGCACTTTGGGTCCGGAGGGCGAGACTCCGGCGGAAGCATTCCCGGGCGGGTGACCCAGCACGGTC
CCTCTTGGAAATTGGATTGCGCATTTTATTTTCTTGCTGCTAAATCACCGAGCCCGGAAGATTAGAGAGTTTATTTTC
TGGGATTCCGTAGACACACCCACCCACATACATACATTTATATATATATATATATATATATAAAAATAAATATC
TCTATTTATATATATAAAAATATATATATTTCTTTTTTAAATTAACAGTGCTAATGTTATTGGTGTCTTCACTGGATG TATTGACTGCTGTGGACTTGAGTTGGGAGGGGAATGTTCC
```

Sequence must be in FASTA format (i.e. requires a header line before sequence). Or you can upload a FASTA file below. Limit 20,000 nucleotides.

## FASTA file upload

 No file chosen

Files must be less than 50 KB.

Allowed file types: **txt fa fasta**.

## Input Name

Give a name for this submission to be used for labeling output. No spaces or unique characters allowed. Default = "UserInput"

## E-mail address

When your job is complete an email will be sent to this address along with a link to results.

## expires

## Window Size

This will adjust the window size (in nucleotides) which is used to canvas input sequence (default 120)

## Step Size

This will adjust the step size (in nucleotides) of the ScanFold-Scan scanning window analysis. By default this is set to 10 nucleotides. Smaller numbers take longer but increase sequence coverage; larger numbers decrease computational time but reduce sequence coverage.

## Randomizations

This will adjust the number of randomizations (number of randomized minimum free energy values) which will be used to calculate the thermodynamic z-score (Default: 30)

## Shuffle Type:

ADVANCED SETTING. This will change the method of shuffling used to generate randomized sequence during calculation of the thermodynamic z-score. mono = mononucleotide shuffling; di = dinucleotide shuffling (using Clote's implementation of the Altschul and Erickson algorithm (Mol Bio Evol. 1985)).

## Temperature

This will adjust the temperature (in Celsius) at which the minimum free energy RNA secondary structures will be folded (default 37)

## Competition

ADVANCED SETTING. 1 = ON (default). 0 = OFF. This field adjusts whether ScanFold will detect and select the most favorable base pairs in regions with competition (when multiple base pairs compete for same partner). ScanFold-Fold results are calculated much faster but are now limited: no CT files or final partner files can be generated; IGV base pair stats are not shown; all base pairs are shown. ScanFold-Scan results are unaffected.

 Global Refold

When checked, this option will refold your entire sequence while constraining the most significant base pairs (with Zavg values < -1 and < -2).
